# Supplementary material for: Integrity of the LXXLL motif in Stat6 is required for the inhibition of breast cancer cell growth and enhancement of differentiation in the context of progesterone
Source: PubMed Central journal article supplement (PMC4021501; doi:10.1186/1471-2407-14-10), 2014-01-08

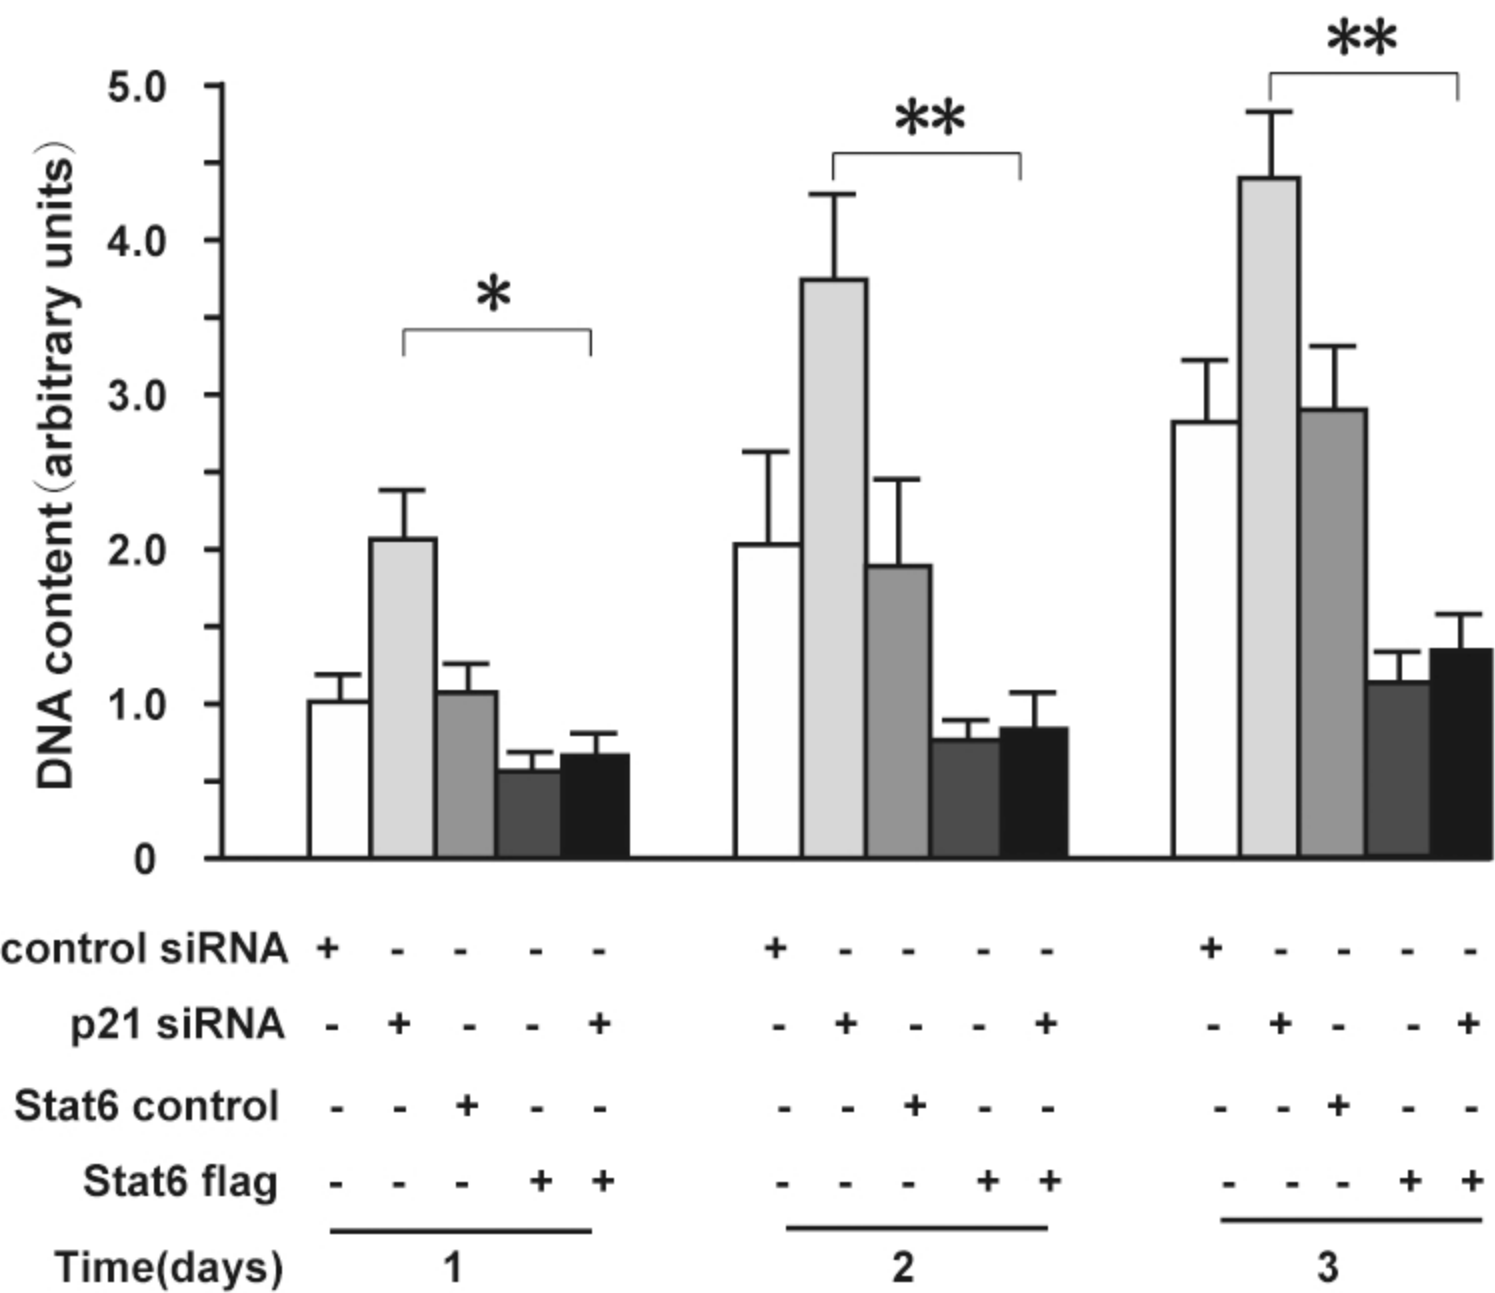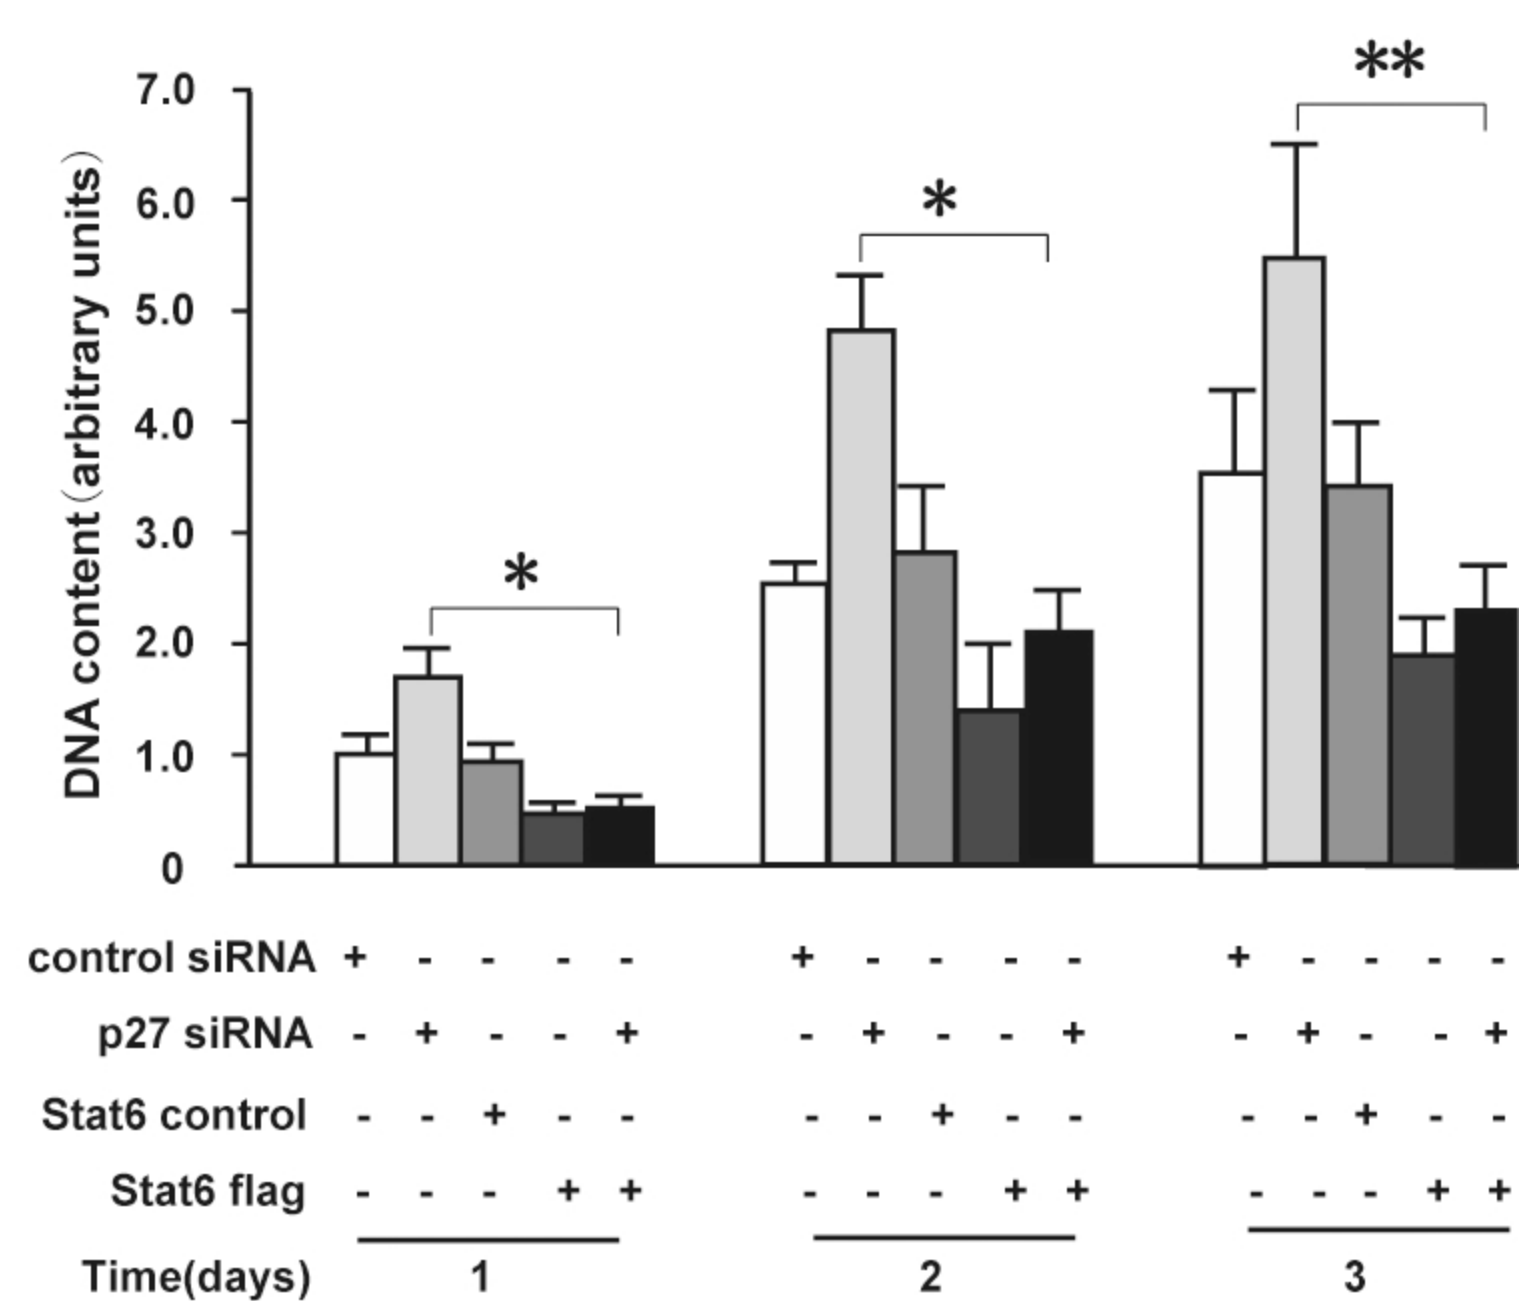

Supplement: 1471-2407-14-10-S7.pdf [file 1471-2407-14-10-S7.pdf]
